# Supplementary material for: Male Knock-in Mice Expressing an Arachidonic Acid Lipoxygenase 15B (Alox15B) with Humanized Reaction Specificity Are Prematurely Growth Arrested When Aging
Source: MDPI journal article supplement (doi:10.3390/biomedicines10061379), 2022-06-10
Supplement: s1 [file s1]

## Supplemental information to the paper

### Male knock-in mice expressing an arachidonic acid lipoxygenase 15b (Alox15b) with humanized reaction specificity are prematurely growth arrested when aging

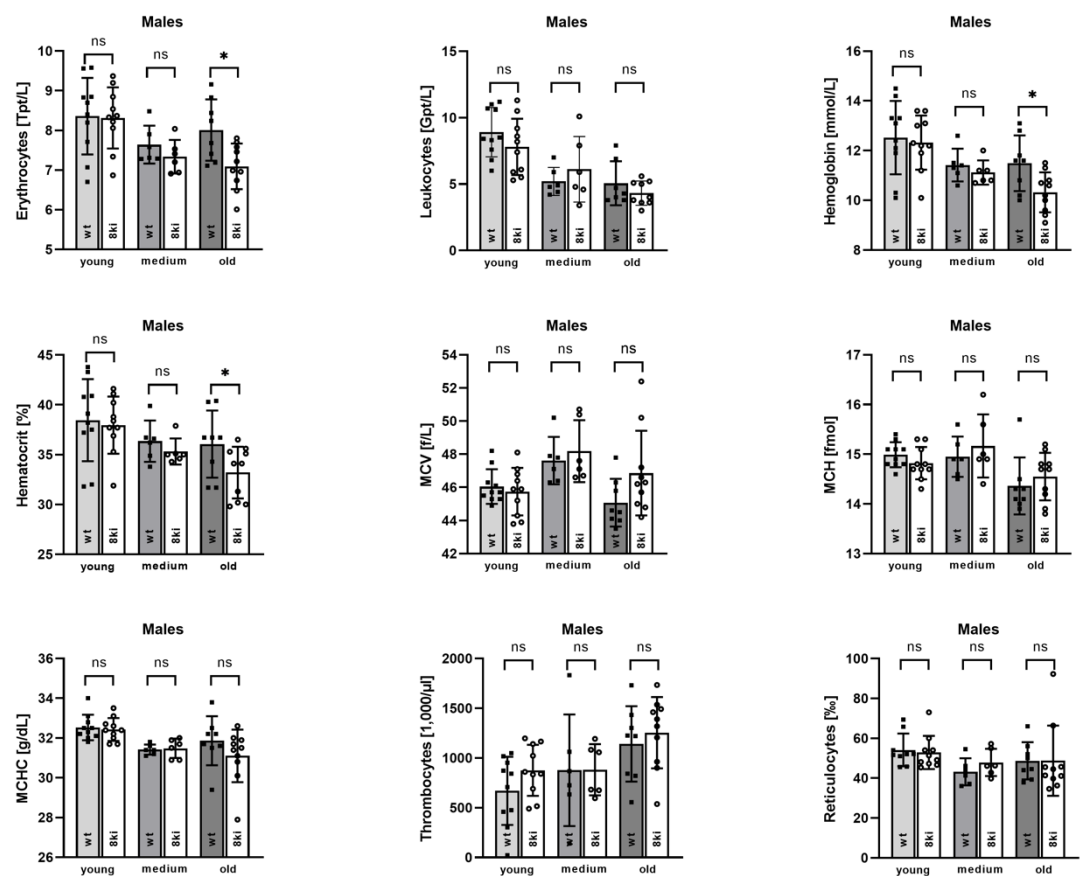

**Figure S1.** Basic hematological parameters of male Alox15-KI mice and outbred wildtype control animals of different age categories. Alox15b-KI mice and outbred wildtype controls of either sex were classified in three age categories (young mice, 10-20weeks; middle-aged mice, 30-40 weeks; old mice, 70-80 weeks,  $n \geq 5$  for each age group). After sacrificing the animals by cervical dislocation under anesthesia EDTA blood was removed by heart puncture. The basic hematological parameters were determined by Institut für Veterinärmedizinische Diagnostik GmbH (Berlin, Germany).

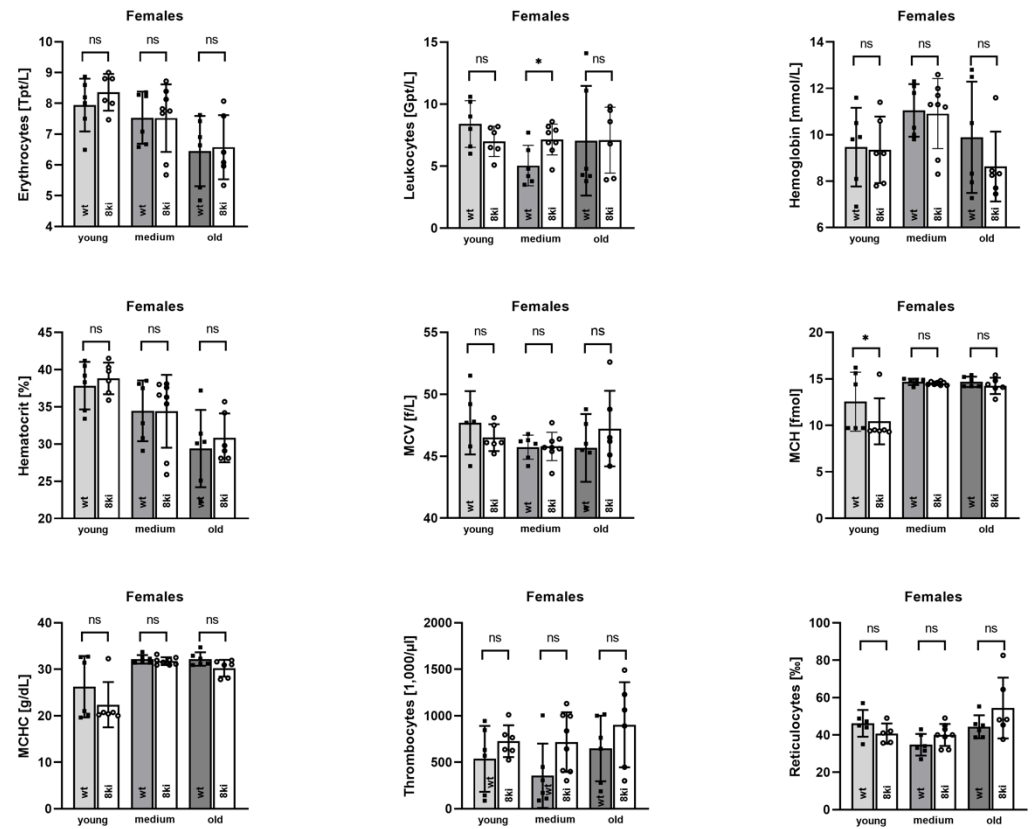

**Figure S2.** Basic hematological parameters of female Alox15-KI mice and outbred wildtype control animals of different age categories. Alox15b-KI mice and outbred wildtype controls of either sex were classified in three age categories (young mice, 10-20 weeks; middle-aged mice, 30-40 weeks; old mice, 70-80 weeks,  $n \geq 5$  for each age-group). After sacrificing the animals by cervical dislocation under anesthesia EDTA blood was removed by heart puncture. The basic hematological parameters were determined by Institut für Veterinärmedizinische Diagnostik GmbH (Berlin, Germany).

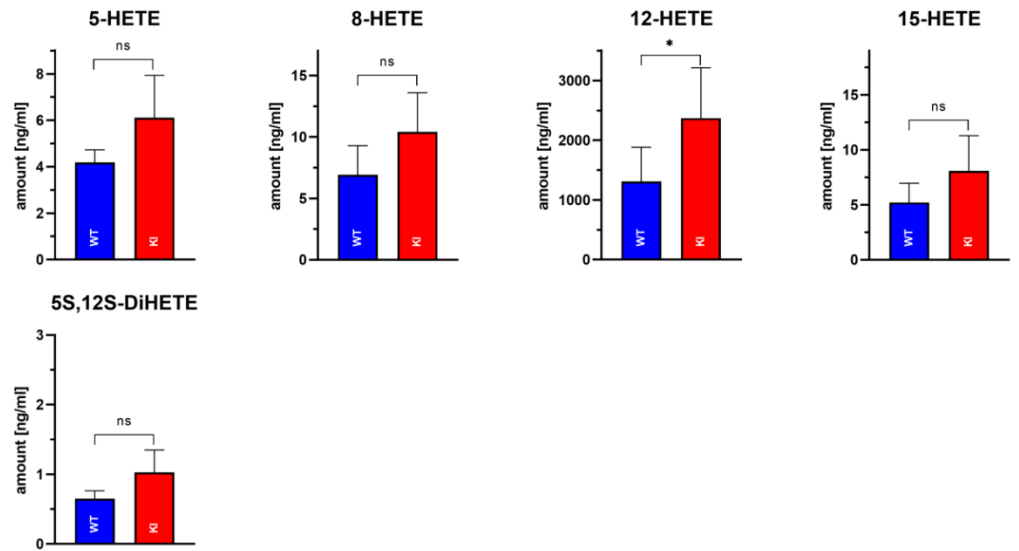

**Figure S3.** Quantification of the major free oxygenated arachidonic acid metabolites in the blood plasma of Alox15b-KI mice and outbred wildtype controls. The lipids were extracted from the blood plasma of Alox15b-KI mice and outbred wildtype controls (n=5 each) and the specified free oxylipins were analyzed by LC-MS (see Materials and Methods).

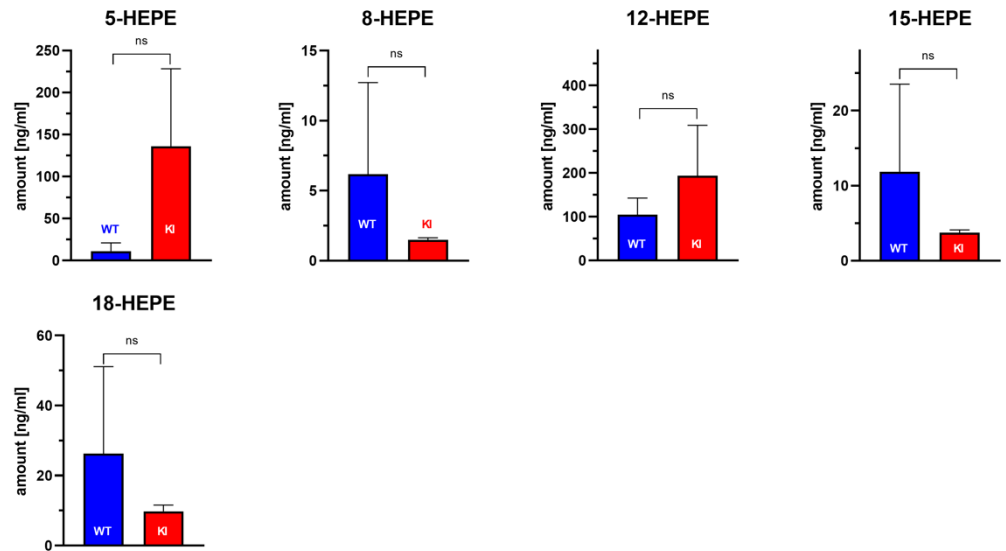

**Figure S4.** Quantification of the major free oxygenated 5,8,11,14,17-eicosapentaenoic acid metabolites in the blood plasma of Alox15b-KI mice and outbred wildtype controls. The lipids were extracted from the blood plasma of Alox15b-KI mice and outbred wildtype controls (n=5 each) and the specified free oxylipins were analyzed by LC-MS (see Materials and Methods).

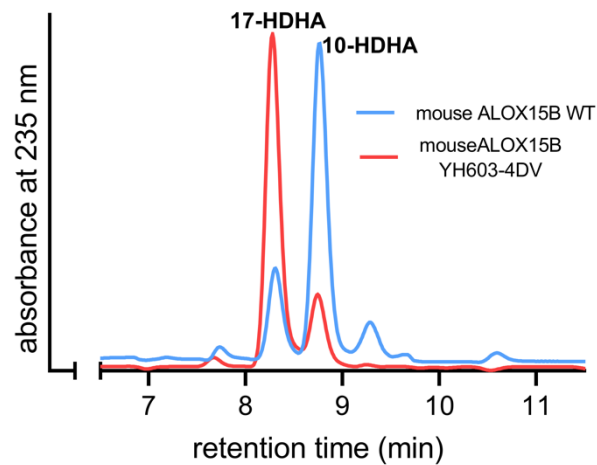

**Figure S5.** RP-HPLC analysis of the major conjugated dienes formed from 4,7,10,13,16,19-docosahexaenoic acid (DHA) by recombinant mouse Alox15b and its Tyr603Asp+His604Val double mutant exhibiting a humanized reaction specificity with arachidonic acid as substrate. Wildtype recombinant mouse Alox15b and its Tyr603Asp+His604Val double mutant were expressed as N-terminal his-tag fusion proteins in *E. coli* (see Materials and Methods) and the bacterial lysis supernatants were used as enzyme source. Aliquots of the lysis supernatant were incubated in PBS with 100  $\mu$ M of DHA. The oxygenation products were prepared and analyzed by RP-HPLC (see Materials and Methods). The retention times of authentic standards are indicated by the arrows above the traces and the MS spectra of the major conjugated dienes (data not shown) confirmed their chemical structures.

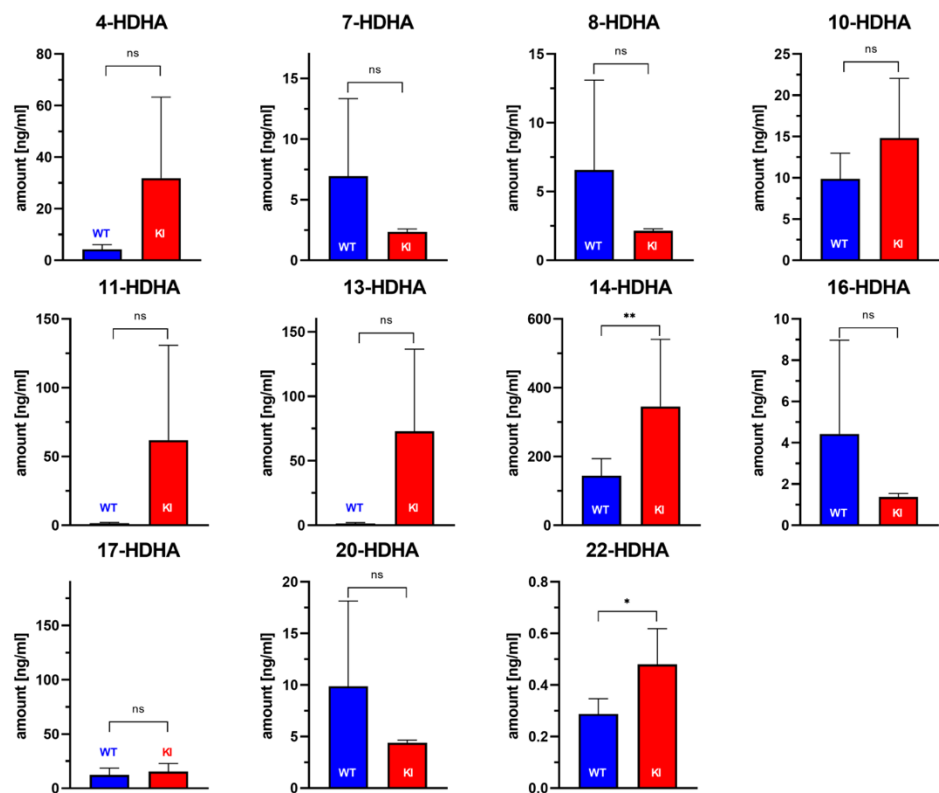

**Figure S6.** Quantification of the major free oxygenated 4,7,10,13,16,19-docosahexaenoic acid metabolites in the blood plasma of Alox15b-KI mice and outbred wildtype controls. The lipids were extracted from the blood plasma of Alox15b-KI mice and outbred wildtype controls (n=5 each) and the specified free oxylipins were analyzed by LC-MS (see Materials and Methods).

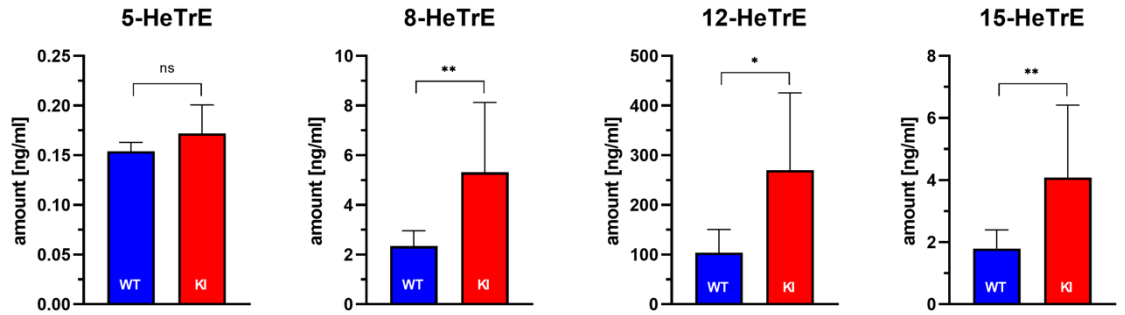

**Figure S7.** Quantification of the major free oxygenated metabolites of 8,11,14-eicosatrienoic acid in the blood plasma of Alox15b-KI mice and outbred wildtype controls. The lipids were extracted from the blood plasma of Alox15b-KI mice and outbred wildtype controls (n=5 each) and the specified free oxylipins were analyzed by LC-MS (see Materials and Methods).

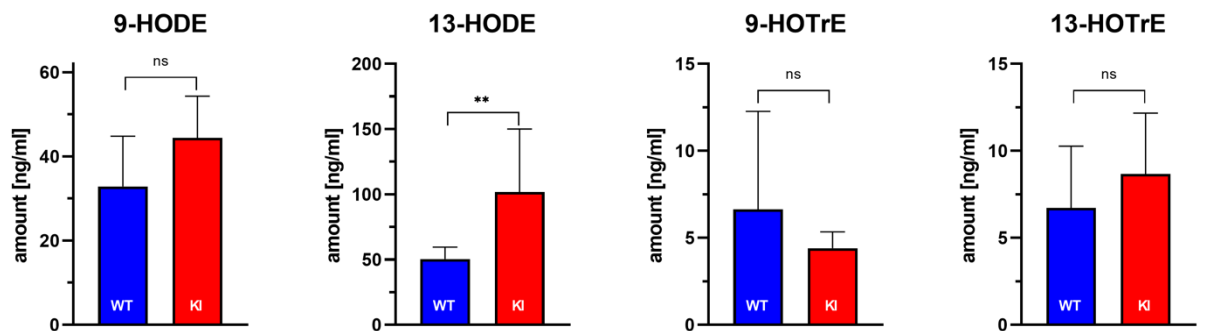

**Figure S8.** Quantification of the major free oxygenated linoleic acid (HODE-isomers) and alpha-linolenic acid metabolites (HOTrE-isomers) in the blood plasma of Alox15b-KI mice and outbred wildtype controls. The lipids were extracted from the blood plasma of Alox15b-KI mice and outbred wildtype controls (n=5 each) and the specified free oxylipins were analyzed by LC-MS (see Materials and Methods).

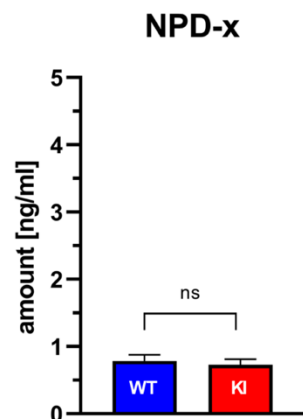

**Figure S9.** Quantification of free NPx in the blood plasma of Alox15b-KI mice and outbred wildtype controls. The lipids were extracted from the blood plasma of Alox15b-KI mice and outbred wildtype controls (n=5 each) and the specified free oxylipins were analyzed by LC-MS (see Materials and Methods).

**Table S1.** Off-target analysis of our *in vivo* mutagenesis strategy. When we screened the mouse genome with the sequence of our targeting oligonucleotide, we detected 5 potential off-target sequences on different chromosomes. These regions were amplified by genomic PCR and the amplification products were sequenced. In all cases we detected the wildtype sequences.

| Location                  | Number of mismatches | Sequencing result |
|---------------------------|----------------------|-------------------|
| Chr2 13819347 – 13819369  | 5                    | wildtype          |
| Chr2 52611563 – 52611585  | 3                    | wildtype          |
| Chr16 14176363 – 14176385 | 4                    | wildtype          |
| Chr9 25478640 – 25478662  | 4                    | wildtype          |
| Chr15 92238427 – 92238449 | 5                    | wildtype          |

**Table S2.** Mobile phase gradient used for LC-separation of the plasma oxylipins. The extracted plasma oxylipins were separated by RP-HPLC as described in the Material and Methods section using a gradient of the mobile phase that was made out of two solvent stock solutions: Stock A: water containing 0.05 % acetic acid (low elution power), stock B: 1:1 mixture of methanol : acetonitrile (high elution power).

| Time<br>[min] | Solvent stock so-<br>lution B [%] |
|---------------|-----------------------------------|
| 0             | 5                                 |
| 0.5           | 56                                |
| 5.5           | 61                                |
| 18.5          | 87                                |
| 18.6          | 98                                |

**Table S3.** Ionization conditions used in our LC-MS based analysis of the blood plasma oxylipins. The extracted plasma lipids were analyzed by LC-MS as described in the Materials and Method section and the ionization conditions used for MS analysis are specified in this table.

| Parameter                     | Conditions        |
|-------------------------------|-------------------|
| Drying gas temperature / flow | 105 °C / 16 L/min |
| Sheath gas temperature / flow | 390 °C / 12 L/min |
| Nebulizer pressure            | 32 psi            |
| Capillary voltage             | - 4300 V          |
| Nozzel voltage                | - 1950 V          |

**Table S4.** Characteristic mass transitions, collision energies and retention times of the different oxylipins.

| Oxylipin       | Precursor Ion | Product ion | MS Res | Collision Energy (V) | Ret Time (min) |
|----------------|---------------|-------------|--------|----------------------|----------------|
| 10-HDHA        | 343.2         | 181.1       | Wide   | 11                   | 16.725         |
| 10-HDHA        | 343.2         | 153.1       | Wide   | 14                   | 16.725         |
| 11-HDHA        | 343.2         | 149.1       | Wide   | 12                   | 17.013         |
| 11-HDHA        | 343.2         | 121.1       | Wide   | 13                   | 17.013         |
| 11-HETE        | 319.2         | 167.1       | Wide   | 14                   | 16.623         |
| 11-HETE        | 319.2         | 149.1       | Wide   | 22                   | 16.623         |
| 12-HEPE        | 317.2         | 179.1       | Wide   | 13                   | 15.01          |
| 12-HEPE        | 317.2         | 135.1       | Wide   | 13                   | 15.01          |
| 12-HETE        | 319.2         | 179.2       | Wide   | 13                   | 16.935         |
| 12-HETE        | 319.2         | 135.1       | Wide   | 14                   | 16.935         |
| 12-HeTrE       | 321.2         | 181         | Wide   | 20                   | 17.9           |
| 12-HeTrE       | 321.2         | 209         | Wide   | 22                   | 17.9           |
| 13-gamma-HOTrE | 293.2         | 193         | Wide   | 18                   | 14.46          |
| 13-HDHA        | 343.2         | 221.2       | Wide   | 10                   | 16.546         |
| 13-HDHA        | 343.2         | 193.2       | Wide   | 12                   | 16.546         |
| 13-HODE        | 295.2         | 195.2       | Wide   | 18                   | 15.813         |
| 13-HODE-d4     | 299.2         | 198.1       | Wide   | 18                   | 15.857         |
| 13-HOTrE       | 293.2         | 195         | Wide   | 18                   | 14.07          |
| 13-HOTrE       | 293.2         | 223         | Wide   | 20                   | 14.07          |
| 14.15-DHET-d11 | 348.3         | 207.1       | Wide   | 20                   | 13.031         |
| 14.15-DHET-d11 | 348.3         | 140.1       | Wide   | 20                   | 13.031         |
| 14-HDHA        | 343.2         | 205.1       | Wide   | 11                   | 16.734         |
| 14-HDHA        | 343.2         | 161.1       | Wide   | 13                   | 16.734         |
| 15(R)epi-LXA4  | 351           | 135         | Wide   | 18                   | 7.186          |
| 15(R)epi-LXA4  | 351           | 115         | Wide   | 15                   | 7.186          |
| 15-HEPE        | 317.2         | 219.2       | Wide   | 11                   | 14.648         |
| 15-HEPE        | 317.2         | 175.1       | Wide   | 13                   | 14.648         |
| 15-HETE        | 319.2         | 219.2       | Wide   | 11                   | 16.252         |
| 15-HETE        | 319.2         | 121.1       | Wide   | 16                   | 16.252         |
| 15-HETE-d8     | 327.2         | 226.2       | Wide   | 11                   | 16.143         |
| 15-HETE-d8     | 327.2         | 214.2       | Wide   | 14                   | 16.143         |
| 15-HETE-d8     | 327.2         | 182.1       | Wide   | 14                   | 16.143         |
| 17(R)RvD1      | 375           | 215         | Wide   | 18                   | 7.227          |
| 17(R)RvD1      | 375           | 141         | Wide   | 16                   | 7.227          |
| 17(R.S)-RvD4   | 375.3         | 131         | Wide   | 14                   | 8.51           |
| 17(R.S)-RvD4   | 375.3         | 101         | Wide   | 21                   | 8.51           |
| 17-HDHA        | 343.2         | 245.2       | Wide   | 10                   | 16.431         |
| 17-HDHA        | 343.2         | 201.1       | Wide   | 13                   | 16.431         |
| 18-HEPE        | 317.2         | 259.2       | Wide   | 9                    | 14.22          |
| 18-HEPE        | 317.2         | 215.2       | Wide   | 13                   | 14.22          |
| 20-HDHA        | 343.2         | 241.2       | Wide   | 11                   | 16.059         |



| Oxylipin          | Precursor Ion | Product ion | MS Res | Collision Energy (V) | Ret Time (min) |
|-------------------|---------------|-------------|--------|----------------------|----------------|
| 20-HDHA           | 343.2         | 227.2       | Wide   | 15                   | 16.059         |
| 20-HETE-d6        | 325.2         | 295.2       | Wide   | 18                   | 15.045         |
| 20-HETE-d6        | 325.2         | 281.1       | Wide   | 16                   | 15.045         |
| 4-HDHA            | 343.2         | 133.1       | Wide   | 14                   | 17.983         |
| 4-HDHA            | 343.2         | 101         | Wide   | 13                   | 17.983         |
| 5(S).15(S)-DiHETE | 335.3         | 173         | Wide   | 14                   | 10.88          |
| 5(S).15(S)-DiHETE | 335.3         | 255.1       | Wide   | 18                   | 10.88          |
| 5(S).12(S)-DiHETE | 335.2         | 195.1       | Wide   | 16                   | 11.82          |
| 5(S).12(S)-DiHETE | 335.2         | 129         | Wide   | 20                   | 11.82          |
| 5-HEPE            | 317.2         | 201.1       | Wide   | 13                   | 15.48          |
| 5-HEPE            | 317.2         | 115.1       | Wide   | 11                   | 15.48          |
| 5-HETE            | 319.2         | 191.2       | Wide   | 14                   | 17.521         |
| 5-HETE            | 319.2         | 115.1       | Wide   | 14                   | 17.521         |
| 5-HeTrE           | 321.2         | 115         | Wide   | 14                   | 19.64          |
| 5-HeTrE           | 321.2         | 259         | Wide   | 15                   | 19.64          |
| 6(S)-LXA4         | 351           | 135         | Wide   | 19                   | 7.6            |
| 6(S)-LXA4         | 351           | 115         | Wide   | 13                   | 7.6            |
| 7-epi-MaR1        | 359           | 297         | Wide   | 13                   | 10.081         |
| 7-epi-MaR1        | 359           | 177         | Wide   | 16                   | 10.081         |
| 7-HDHA            | 343.2         | 141.1       | Wide   | 11                   | 17.144         |
| 7-HDHA            | 343.2         | 113.1       | Wide   | 18                   | 17.144         |
| 8.9-EET-d11       | 330.3         | 268.2       | Wide   | 12                   | 18.64          |
| 8.9-EET-d11       | 330.3         | 167.1       | Wide   | 13                   | 18.64          |
| 8.9-EET-d11       | 330.3         | 159.1       | Wide   | 24                   | 18.64          |
| 8-HDHA            | 343.2         | 189.1       | Wide   | 11                   | 17.338         |
| 8-HDHA            | 343.2         | 109         | Wide   | 12                   | 17.338         |
| 8-HEPE            | 317.2         | 161.1       | Wide   | 17                   | 14.91          |
| 8-HEPE            | 317.2         | 155.1       | Wide   | 13                   | 14.91          |
| 8-HETE            | 319.2         | 155.1       | Wide   | 12                   | 16.915         |
| 8-HETE            | 319.2         | 127.1       | Wide   | 22                   | 16.915         |
| 9-HEPE            | 317.2         | 167.1       | Wide   | 13                   | 15.201         |
| 9-HEPE            | 317.2         | 149.1       | Wide   | 13                   | 15.201         |
| 9-HETE            | 319.2         | 151.1       | Wide   | 13                   | 17.299         |
| 9-HETE            | 319.2         | 123.1       | Wide   | 15                   | 17.299         |
| 9-HODE            | 295.1         | 171         | Wide   | 21                   | 15.94          |
| 9-HODE            | 295.1         | 277         | Wide   | 21                   | 15.94          |
| 9-HOTrE           | 293.2         | 171         | Wide   | 13                   | 13.88          |
| 9-HOTrE           | 293.2         | 121         | Wide   | 18                   | 13.88          |
| LTB4              | 335.2         | 129         | Wide   | 20                   | 11.45          |
| LTB4              | 335.2         | 195.1       | Wide   | 16                   | 11.45          |
| LTB4-6-trans      | 335.2         | 195.1       | Wide   | 16                   | 10.54          |
| LTB4-6-trans      | 335.2         | 129         | Wide   | 20                   | 10.54          |
| LTB4-6-trans-epi  | 335.2         | 195.1       | Wide   | 16                   | 10.89          |

| Oxylipin         | Precursor Ion | Product ion | MS Res | Collision Energy (V) | Ret Time (min) |
|------------------|---------------|-------------|--------|----------------------|----------------|
| LTB4-6-trans-epi | 335.2         | 129         | Wide   | 20                   | 10.89          |
| LTB4-d4          | 339.2         | 197.1       | Wide   | 16                   | 11.59          |
| LTB4-d4          | 339.2         | 59          | Wide   | 32                   | 11.59          |
| LXA4             | 351           | 135         | Wide   | 19                   | 7.15           |
| LXA4             | 351           | 115         | Wide   | 13                   | 7.15           |
| LxA5             | 349           | 233         | Wide   | 11                   | 5.656          |
| LxA5             | 349           | 115         | Wide   | 18                   | 5.656          |
| LXB4             | 351           | 233         | Wide   | 13                   | 6.2            |
| LXB4             | 351           | 221         | Wide   | 15                   | 6.2            |
| Maresin 1        | 359           | 177         | Wide   | 16                   | 11.38          |
| Maresin 1        | 359           | 113         | Wide   | 15                   | 11.38          |
| Maresin 2        | 359.3         | 232.2       | Wide   | 15                   | 12.52          |
| Maresin 2        | 359.3         | 221.2       | Wide   | 12                   | 12.52          |
| NPD1             | 359.3         | 206.1       | Wide   | 15                   | 10.89          |
| NPD1             | 359.3         | 153         | Wide   | 15                   | 10.89          |
| NPDx             | 359.2         | 206         | Wide   | 16                   | 10.76          |
| NPDx             | 359.2         | 153         | Wide   | 16                   | 10.76          |
| PGE2-d4          | 355.2         | 275.2       | Wide   | 18                   | 6.185          |
| PGE2-d4          | 355.2         | 193.2       | Wide   | 20                   | 6.185          |
| RvD1             | 375           | 215         | Wide   | 18                   | 7.073          |
| RvD1             | 375           | 141         | Wide   | 16                   | 7.073          |
| RvD2             | 375           | 277         | Wide   | 13                   | 6.299          |
| RvD2             | 375           | 175         | Wide   | 23                   | 6.299          |
| RvD3             | 375           | 147         | Wide   | 22                   | 6.23           |
| RvD3             | 375           | 115         | Wide   | 18                   | 6.23           |
| RvD5             | 359           | 199         | Wide   | 14                   | 10.98          |
| RvD5             | 359           | 141         | Wide   | 13                   | 10.98          |
| RvE1             | 349           | 195         | Wide   | 17                   | 4.16           |
| RvE1             | 349           | 107         | Wide   | 22                   | 4.16           |

**Table S5.** Metabolites quantified in the frame of our plasma lipidome analysis.

| Parent PUFA                          | Metabolite        | Detection limit (ng/ml plasma) |
|--------------------------------------|-------------------|--------------------------------|
| 9,12-octadecadienoic acid            | 9-HODE            | 0.59                           |
|                                      | 13-HODE           | 0.30                           |
| 9,12,15-octadecatrienoic acid        | 9-HOTrE           | 0.86                           |
|                                      | 13-HOTrE          | 0.86                           |
| 8,11,14-eicosatrienoic acid          | 5-HeTrE           | 0.21                           |
|                                      | 8-HeTrE           | 0.92                           |
|                                      | 12-HeTrE          | 0.49                           |
|                                      | 15-HeTrE          | 0.51                           |
| 5,8,11,14-eicosatetraenoic acid      | 5-HETE            | 0.41                           |
|                                      | 8-HETE            | 3.12                           |
|                                      | 12-HETE           | 0.67                           |
|                                      | 15-HETE           | 0.51                           |
|                                      | LTB4              | 0.28                           |
|                                      | 5(S),12(S)-DiHETE | 0.41                           |
|                                      | 5(S),15(S)-DiHETE | 0.25                           |
|                                      | 8(S),15(S)-DiHETE | 0.35                           |
| 5,8,11,14,17-eicosapentaenoic acid   | 5-HEPE            | 0.41                           |
|                                      | 8-HEPE            | 0.20                           |
|                                      | 12-HEPE           | 0.46                           |
|                                      | 15-HEPE           | 0.72                           |
|                                      | 18-HEPE           | 0.52                           |
|                                      | RvE1              | 1.24                           |
| 4,7,10,13,16,19-docosahexaenoic acid | 4-HDHA            | 0.33                           |
|                                      | 7-HDHA            | 0.55                           |
|                                      | 8-HDHA            | 1.07                           |
|                                      | 10-HDHA           | 0.29                           |
|                                      | 11-HDHA           | 0.35                           |
|                                      | 13-HDHA           | 1.56                           |
|                                      | 14-HDHA           | 0.28                           |
|                                      | 16-HDHA           | 0.29                           |
|                                      | 17-HDHA           | 0.94                           |
|                                      | 20-HDHA           | 0.44                           |
|                                      | 22-HDHA           | 0.18                           |
|                                      | Maresin 1         | 0.32                           |
|                                      | Maresin 2         | 0.22                           |
|                                      | Maresin 7-epi     | 0.31                           |
|                                      | RvD1              | 1.84                           |
|                                      | RvD1 17(R)        | 2.50                           |
|                                      | RvD2              | 2.40                           |
|                                      | RvD3              | 1.89                           |
|                                      | RvD4 17(R,S)      | 2.50                           |
|                                      | RvD5              | 1.40                           |
|                                      | NPD1              | 0.17                           |
|                                      | NPD-x             | 0.36                           |

**Table S6.** Spleen weights of male and female middle-aged Alox15b-KI mice and outbred wildtype controls. Male and female Alox15b-KI mice and outbred wildtype control animals were sacrificed under anesthesia, the spleens were prepared and their weights were determined. The absolute spleen weights of the different individuals of the two different genotypes were compared with the Mann-Whitney U-test.

| Gender | Wildtype          |          | Alox15b-KI        |          | U-test |
|--------|-------------------|----------|-------------------|----------|--------|
|        | Spleen weight (g) | n-number | Spleen weight (g) | n-number |        |
| male   | 0.12±0.02         | 10       | 0.11±0.02         | 12       | n.s.   |
| female | 0.11±0.02         | 13       | 0.12±0.01         | 11       | n.s.   |
